# Supplementary material
Source: publisher site journal article supplement (https://www.kjim.org/upload/media/kjim-2022-173-suppl1.pdf)
Supplement: Supplementary file 1 [file kjim-2022-173-suppl1.pdf]

**Supplementary Table 1. Baseline characteristic of study participants**

| Characteristic | ChAdOx1 (n = 53) | BNT162b2 (n = 49) |
|----------------|------------------|-------------------|
| Age, yr        | 38 (36–43)       | 29 (26–34)        |
| Sex            |                  |                   |
| Female         | 41 (77.4)        | 33 (67.3)         |
| Male           | 12 (22.6)        | 16 (32.7)         |

Values are presented as median (interquartile range) or number (%).
